# Supplementary material for: An improved organic/inorganic solid receptor for colorimetric cyanide-chemosensing in water: towards new mechanism aspects, simplistic use and portability
Source: Royal Society of Chemistry journal article supplement (doi:10.1039/c4cc06756h), 2014-11-04
Supplement: c4cc06756h2.pdf [file c4cc06756h2.pdf]

# Electronic Supporting Information (ESI)

## An Improved Organic/Inorganic Solid Receptor for Colorimetric Cyanide-Chemosensing in Water: Towards New Mechanism Aspects, Simplistic Use and Portability

Arash Mouradzadegan\*, Fatemeh Abadast

\*Department of Chemistry, Faculty of Science, Shahid Chamran University, Ahvaz, Iran  
Fax +98(611)3337009; Tel +98(611)3331042

E-mail: arash\_m@scu.ac.ir

| Table of Contents                                                                     | Pages    |
|---------------------------------------------------------------------------------------|----------|
| <b>1. Experimental Section</b>                                                        | <b>3</b> |
| 1.1. General                                                                          | 3        |
| 1.2. Synthesis of 2,6-bis(4-methoxyphenyl)-4-phenylpyrylium perchlorate ( <b>1a</b> ) | 3        |
| 1.3. Synthesis of (2Z,4E)-6-oxo-2,4,6-triphenyl-2,4-hexadienenitrile ( <b>2a</b> )    | 4        |
| 1.4. Sensitizing the neutral Al <sub>2</sub> O <sub>3</sub>                           | 5        |
| 1.5. Sensitizing the Al <sub>2</sub> O <sub>3</sub> TLC strips                        | 5        |
| 1.6. References                                                                       | 5        |
| <b>2. Structure characterizations for 1a</b>                                          | <b>6</b> |
| 2.1. IR spectra                                                                       | 6        |
| 2.2. <sup>1</sup> H NMR spectra in CDCl <sub>3</sub>                                  | 7        |
| 2.3. <sup>13</sup> C NMR spectra in DMSO-d <sub>6</sub>                               | 8        |
| <b>3. Structure characterizations for 2a</b>                                          | <b>9</b> |

|                                                                              |           |
|------------------------------------------------------------------------------|-----------|
| 3.1. IR spectra                                                              | 9         |
| 3.2. Mass spectra                                                            | 10        |
| 3.3. $^1\text{H}$ NMR spectra in $\text{CDCl}_3$                             | 11        |
| 3.4. $^{13}\text{C}$ NMR spectra in $\text{CDCl}_3$                          | 12        |
| 3.5. X-ray structure data                                                    | 13        |
| <b>4. Comparison of the <math>^1\text{H}</math> NMR spectra of 1a and 2a</b> | <b>17</b> |
| <b>5. Absorption spectra</b>                                                 | <b>18</b> |
| <b>6. Fluorescence emission spectra</b>                                      | <b>18</b> |
| <b>7. Determination of detection limit of <math>\text{CN}^-</math></b>       | <b>19</b> |
| <b>8. Selectivity towards other common anions</b>                            | <b>21</b> |

## 1. Experimental

### 1.1. General

Chemicals were purchased from Fluka, Merck, and Aldrich chemical companies. Monitoring of the reactions was accomplished by TLC. IR spectra were obtained on a Bomem MB:102 FT-IR spectrophotometer.  $^1\text{H}$  NMR and  $^{13}\text{C}$  NMR spectra were recorded on a Bruker spectrometer at 400 and 100 MHz, respectively, in  $\text{CDCl}_3$  or  $\text{DMSO-d}_6$  with tetramethylsilane as an internal standard. MS spectra were measured on an Agilent 5975 Mass Spectrophotometer. All absorption measurements and absorption spectra were performed using PG instrument UV-Vis spectrophotometer model T80 (UK). Fluorescence measurements were performed using a Cary Eclipse Fluorescence Spectrophotometer. The X-ray measurement of the product **2a** was made on a Bruker-Nonius X8 ApexII diffractometer equipped with a CCD area detector by using graphite-monochromated  $\text{Mo K}\alpha$  radiation ( $\lambda = 0.71073 \text{ \AA}$ ) generated from a sealed tube source. Data were collected and reduced by SAINT software in the Bruker package [1]. The structure was solved by direct methods [2] and then developed by least squares refinement on  $F^2$  [3, 4]. All non-H atoms were placed in calculated positions and refined as isotropic with the "riding-model technique".

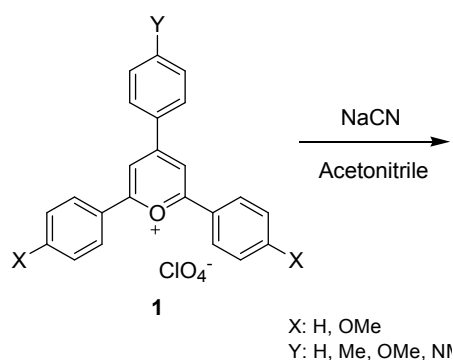

**Scheme S1.** Transformation of triarylpyrylium derivatives **1** into corresponding aromatic cyanodienones **2**

### 1.2. Synthesis of 2,6-bis(4-methoxyphenyl)-4-phenylpyrylium perchlorate (**1a**)

Benzaldehyde (0.06 mol) and 4-methoxy acetophenone (0.12 mol) were stirred at room temperature;  $\text{POCl}_3$  (5 mL) was added dropwise during 30 min. The mixture was stirred at  $65^\circ\text{C}$  for 2 h. Then, ethanol (31.5 mL) and perchloric acid 70% (7.5 mL) was added respectively. The mixture was excluded in order to form a precipitate for 24 h. The precipitates recrystallized from acetic acid. The final product was isolated as deep red solid (49% yield, m.p.  $285\text{-}286^\circ\text{C}$ ).  $^1\text{H}$  NMR (400 MHz,  $\text{CDCl}_3$ ):  $\delta = 3.99$  (s, 6H,  $\text{OCH}_3$ ), 7.22-7.25, 7.67-8.35 (m, 13H, Ar-H), 8.36 (s, 2H,  $\text{H}^1$ ,  $\text{H}^2$ ) ppm;  $^{13}\text{C}$  NMR (100MHz,  $\text{DMSO-d}_6$ ):  $\delta = 56.5$  ( $\text{OCH}_3$ ), 112.9, 115.8, 121.7 (ArC), 129.9, 130.1 ( $\text{ArC}_q$ ), 131.4 (ArC), 133.1, 135.0, 163.5 ( $\text{ArC}_q$ ), 165.2, 169.2 (ArC) ppm.

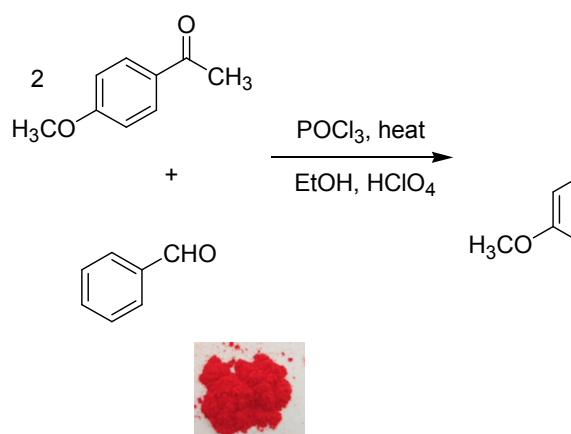

**Scheme S2.** The synthetic procedure for **1a**

### 1.3. Synthesis of (2Z,4E)-6-oxo-2,4,6-triphenyl-2,4-hexadienenitrile (**2a**)

The 2,6-bis(4-methoxyphenyl)-4-phenylpyrylium perchlorate **1a** (1 mmol) were stirred with sodium cyanide (2 mmol) at room temperature in acetonitrile (10 mL), the reaction were monitored by TLC using a 20:80 mixture of ether:*n*-hexan as eluent. After completion of the reaction, the solvent was evaporated under vacuum and the product **2a** recrystallized from EtOH. The final product was isolated as light yellow solid (86% yield, m.p. 127-129 °C). MS *m/z*: 395.2 [ $\text{M}^+$ ]; IR (neat):  $\nu = 2217$  (CN), 1638 (CO)  $\text{cm}^{-1}$ ;  $^1\text{H}$  NMR (400 MHz,  $\text{CDCl}_3$ ):  $\delta = 3.87, 3.91$  (s, 6H,  $\text{OCH}_3$ ), 7.24 (s, 1H,  $\text{H}^1$ ), 6.95-7.00, 7.49-8.04 (m, 13H, Ar-H), 8.35 (s, 1H,  $\text{H}^2$ ) ppm;  $^{13}\text{C}$  NMR (100MHz,  $\text{CDCl}_3$ ):  $\delta = 55.4, 55.5$  ( $\text{OCH}_3$ ), 113.9 (C-5), 114.3 (ArC), 115.7 (C-2), 118.5 (C-1), 125.8 (ArC), 126.3 ( $\text{ArC}_q$ ), 127.9, 128.7, 128.8, 129.9, 130.7 (ArC), 131.5( $\text{ArC}_q$ ), 138.9 (C-3), 139.4, 151.0 ( $\text{ArC}_q$ ), 160.9 (C-4), 163.5 ( $\text{ArC}_q$ ), 188.7 (C-6) ppm.

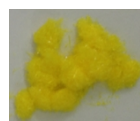

#### 1.4. Sensitizing the neutral $Al_2O_3$

A 50-ml round-bottom flask was charged with 0.25 g (0.54 mmol) of compound **1a** suspended in 50 ml of dichloromethane, and then 4.0 g of  $\gamma$ -Alumina was added. The flask was transferred to a rotary evaporator, and the dichloromethane was removed under reduced pressure, keeping the bath temperature below 65 °C. Dye-impregnated  $\gamma$ -alumina was then dried at room temperature.

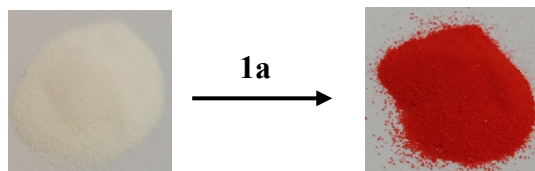

#### 1.5. Sensitizing the $Al_2O_3$ TLC strips

Compound **1a** was absorbed into  $Al_2O_3$  TLC strip by immersing the TLC in a suspension of the compound **1a** (5 mM) in dichloromethane maintained in the refrigerator. It was allowed to stand for another 12 h so the dye could impregnate the TLC strip. A deep red **1a**/ $Al_2O_3$  TLC strip was obtained.

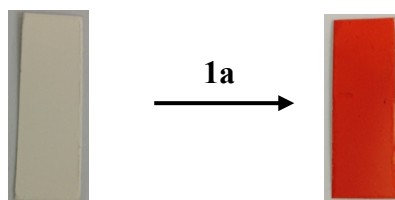

#### 1.6. References

- [1] Bruker AXS Inc., SAINT (Version 6.02), Madison, Wisconsin, USA, 1999.
- [2] M.C. Burla, R. Caliendo, M. Camalli, B. Carrozzini, G.L. Cascarano, L. De Caro, C. Giacovazzo, G. Polidori, R. Spagna, *J. Appl. Crystallogr.* 38 (2005) 381–388.
- [3] G.M. Sheldrick, SHELXL97, Program for Crystal Structure Refinement, University of Göttingen, Germany, 1997.
- [4] SHELXT LN, Version 5.10, Bruker Analytical X-ray Inc., Madison, WI, USA, 1998.

## 2. Structure characterizations for 1a

### 2.1. IR spectra

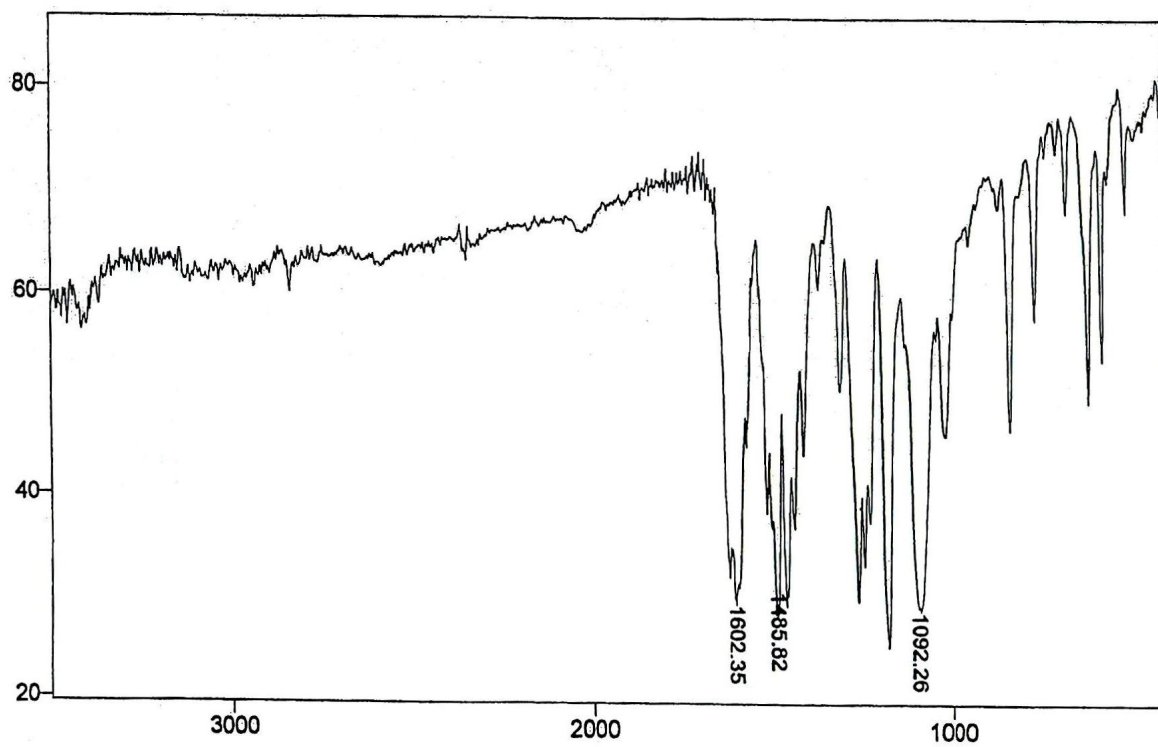

2.2.  $^1\text{H}$  NMR spectra in  $\text{CDCl}_3$

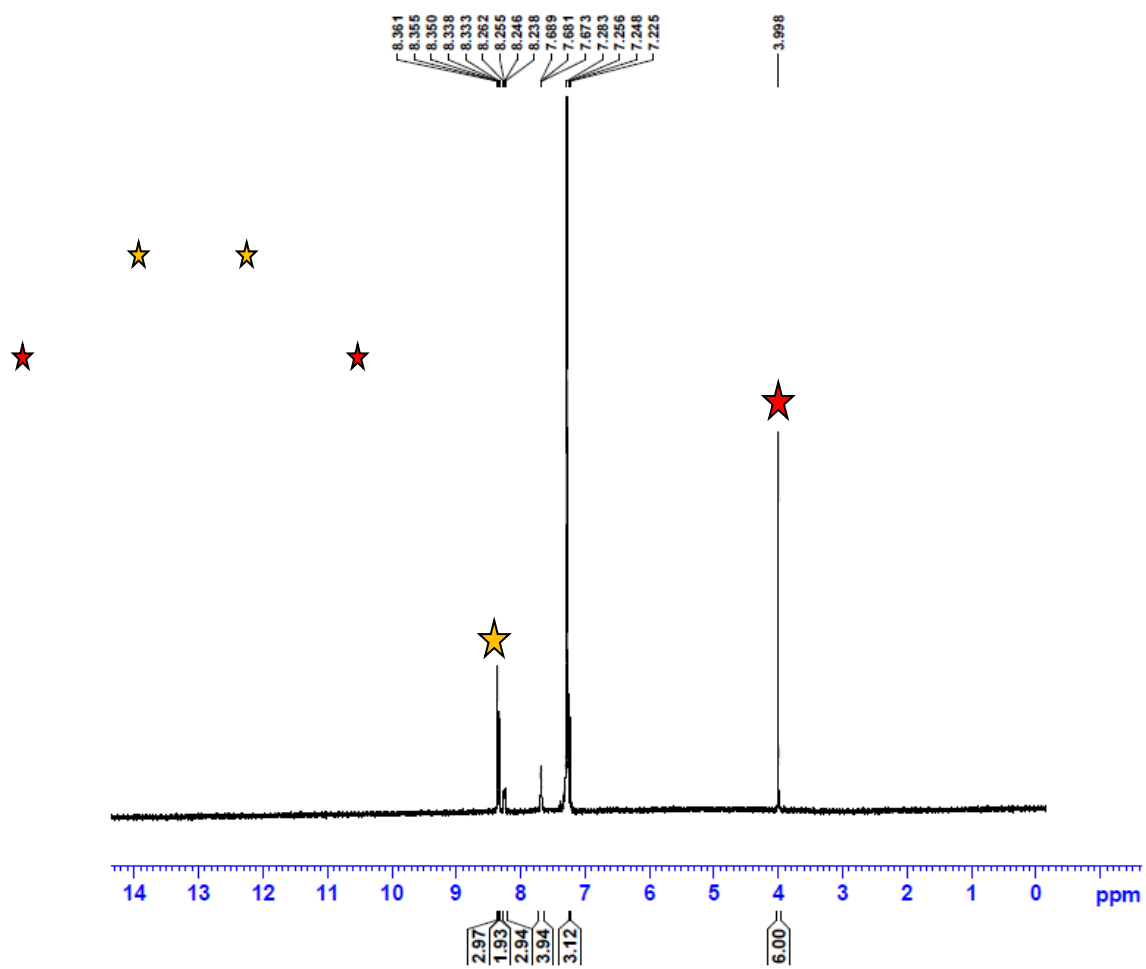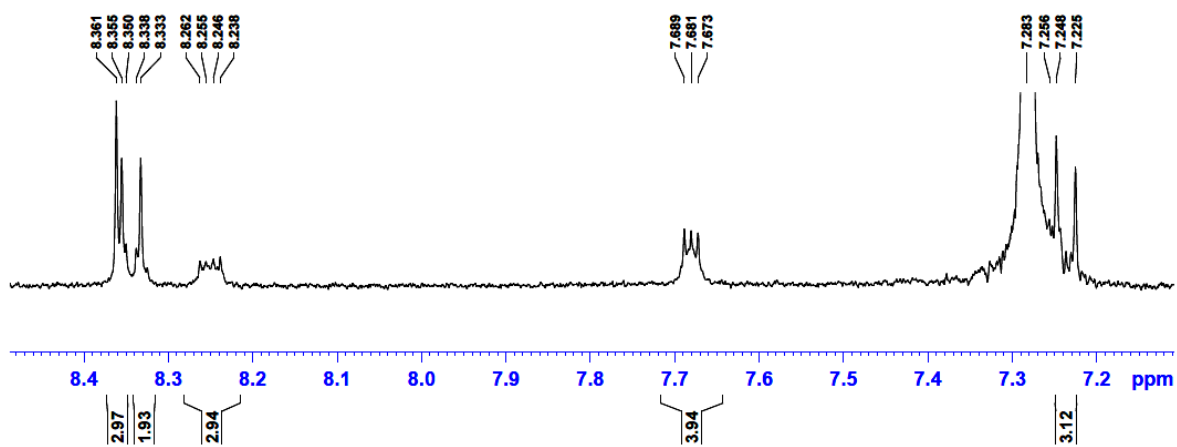

2.3.  $^{13}\text{C}$  NMR spectra in  $\text{DMSO-}d_6$

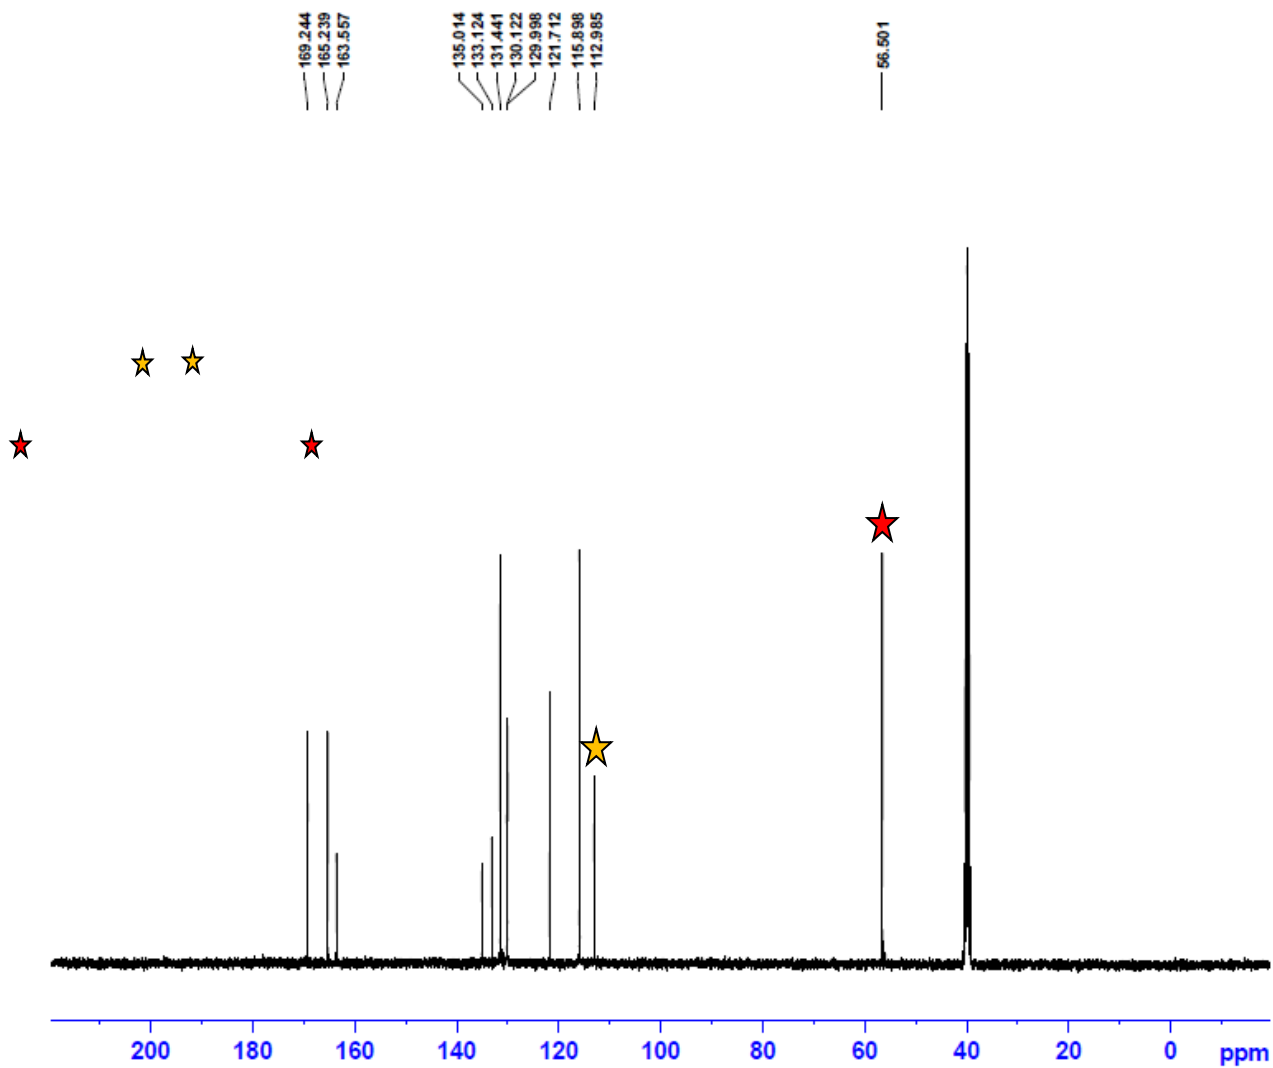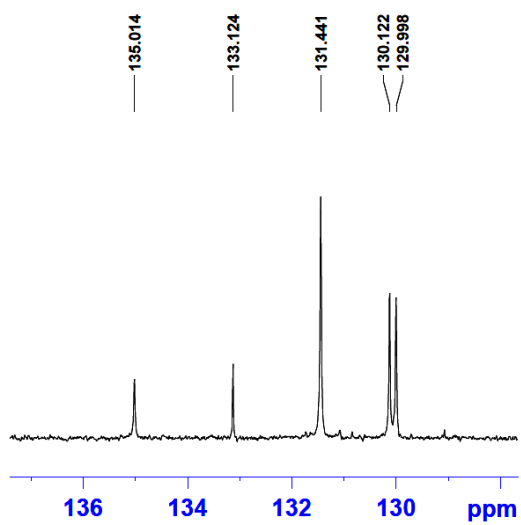



### 3. Structure characterizations for 2a

#### 3.1. IR spectra

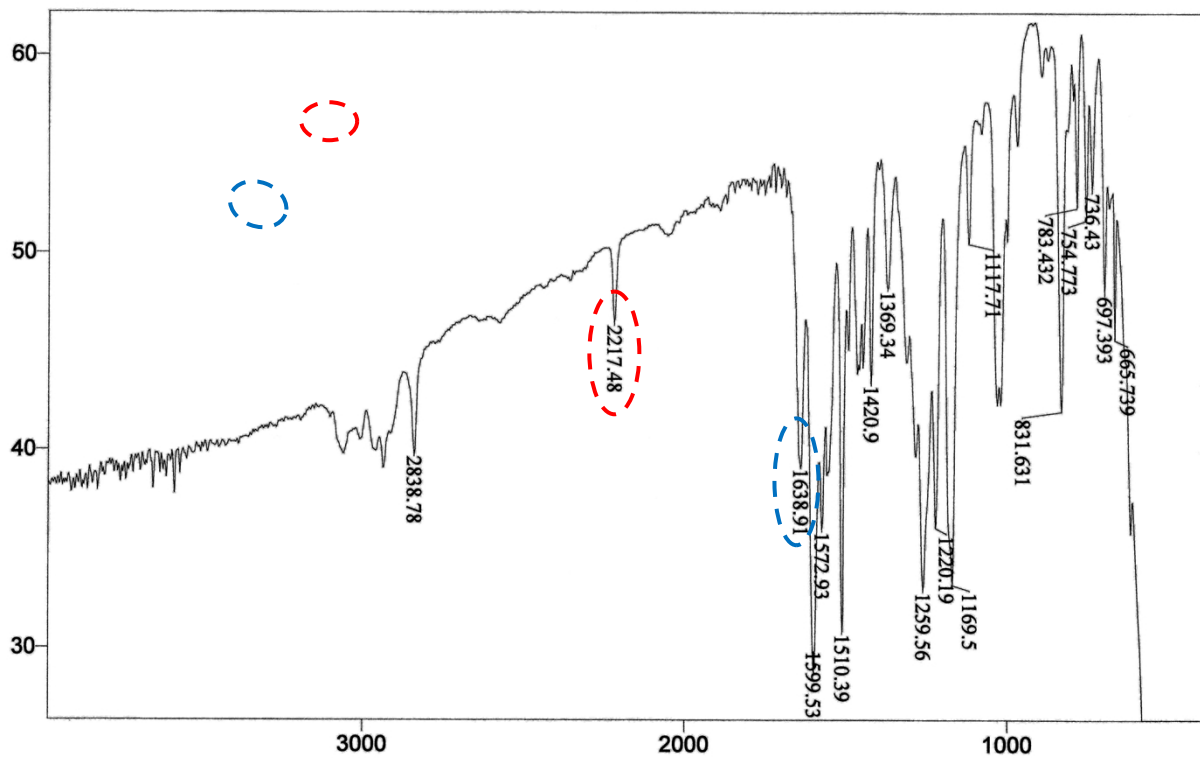

### 3.2. Mass spectra

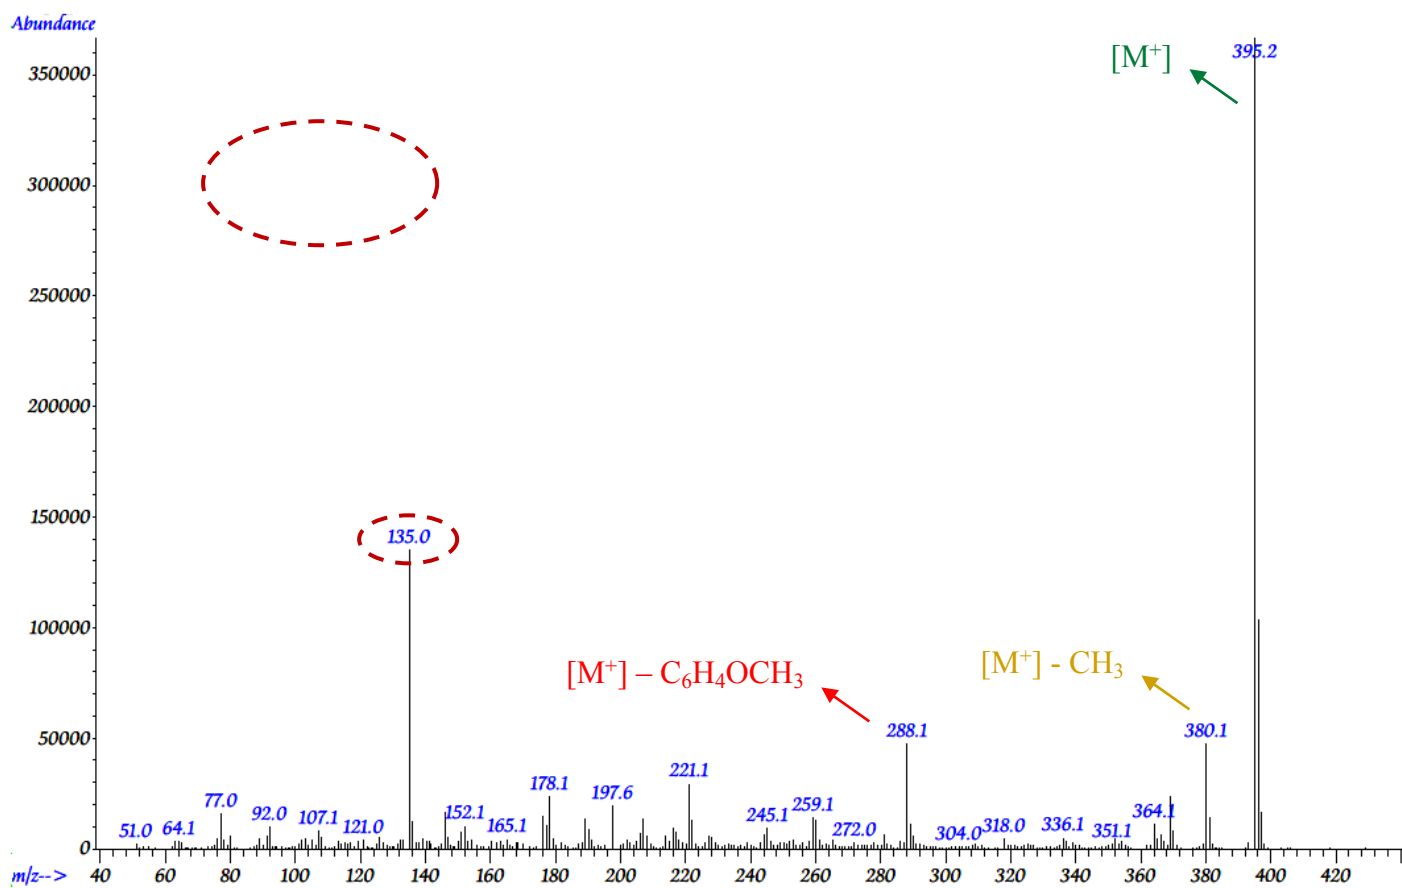

### 3.3. $^1\text{H}$ NMR spectra in $\text{CDCl}_3$

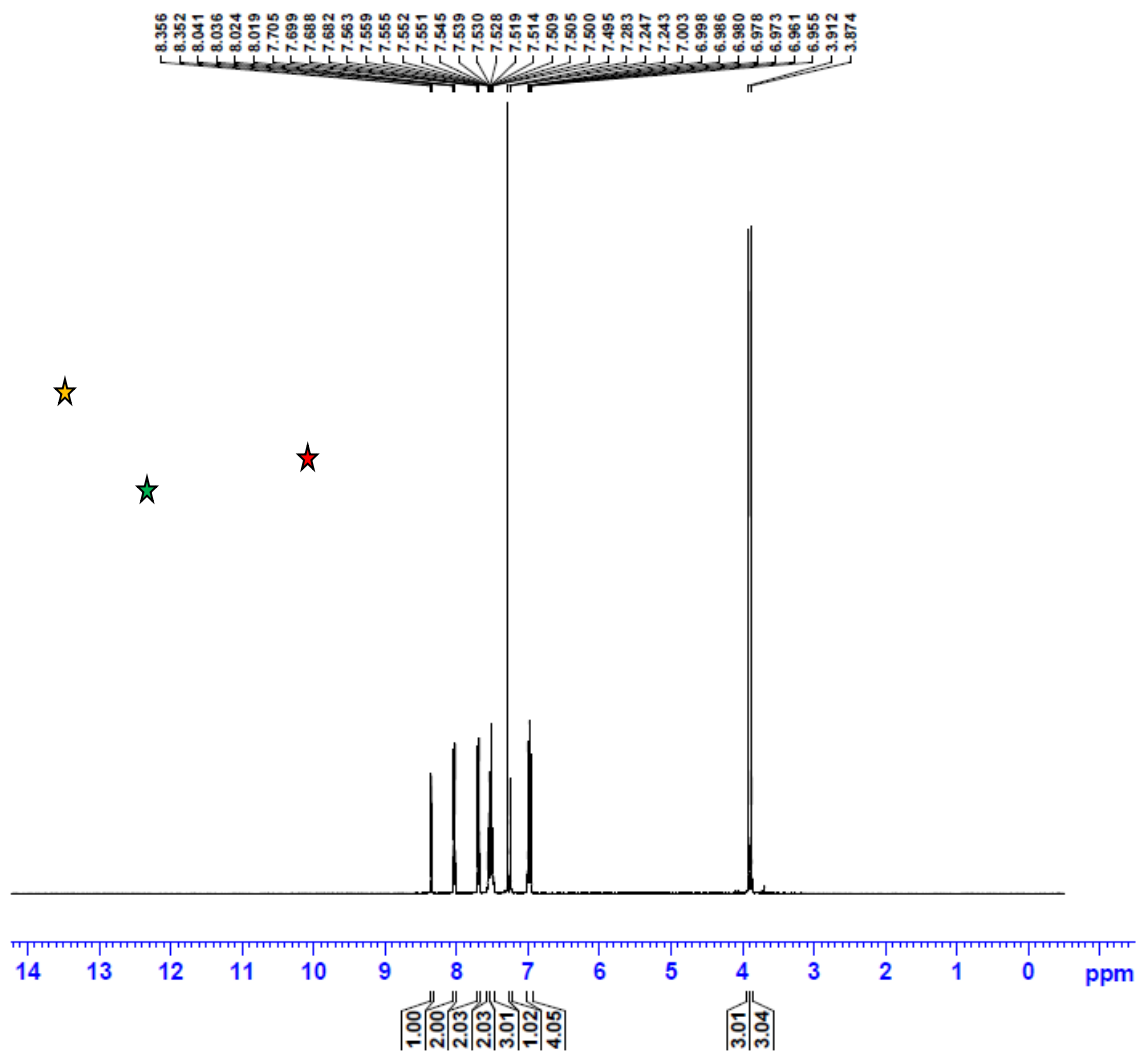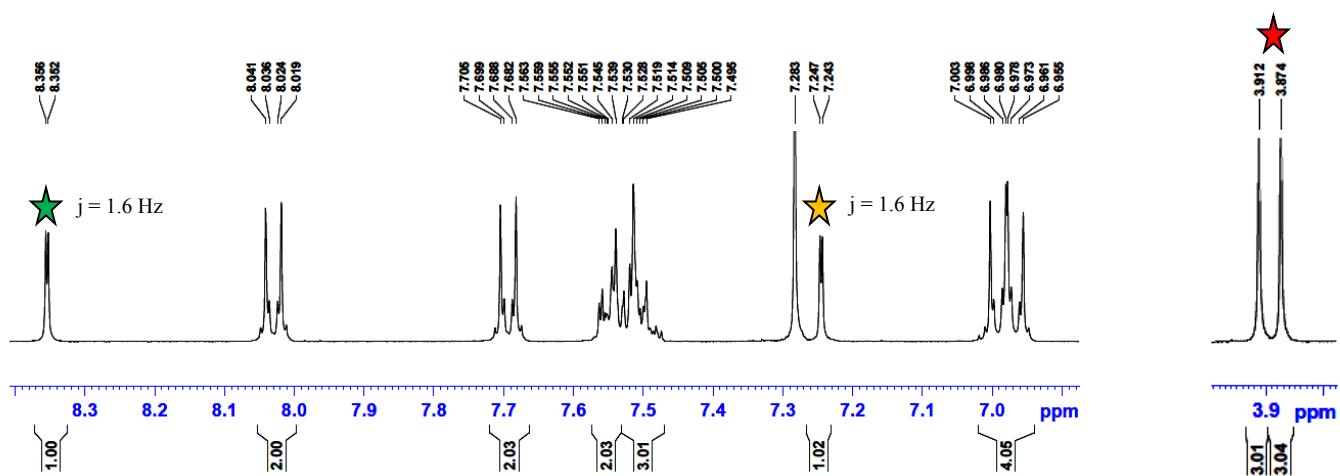

3.4.  $^{13}\text{C}$  NMR spectra in  $\text{CDCl}_3$

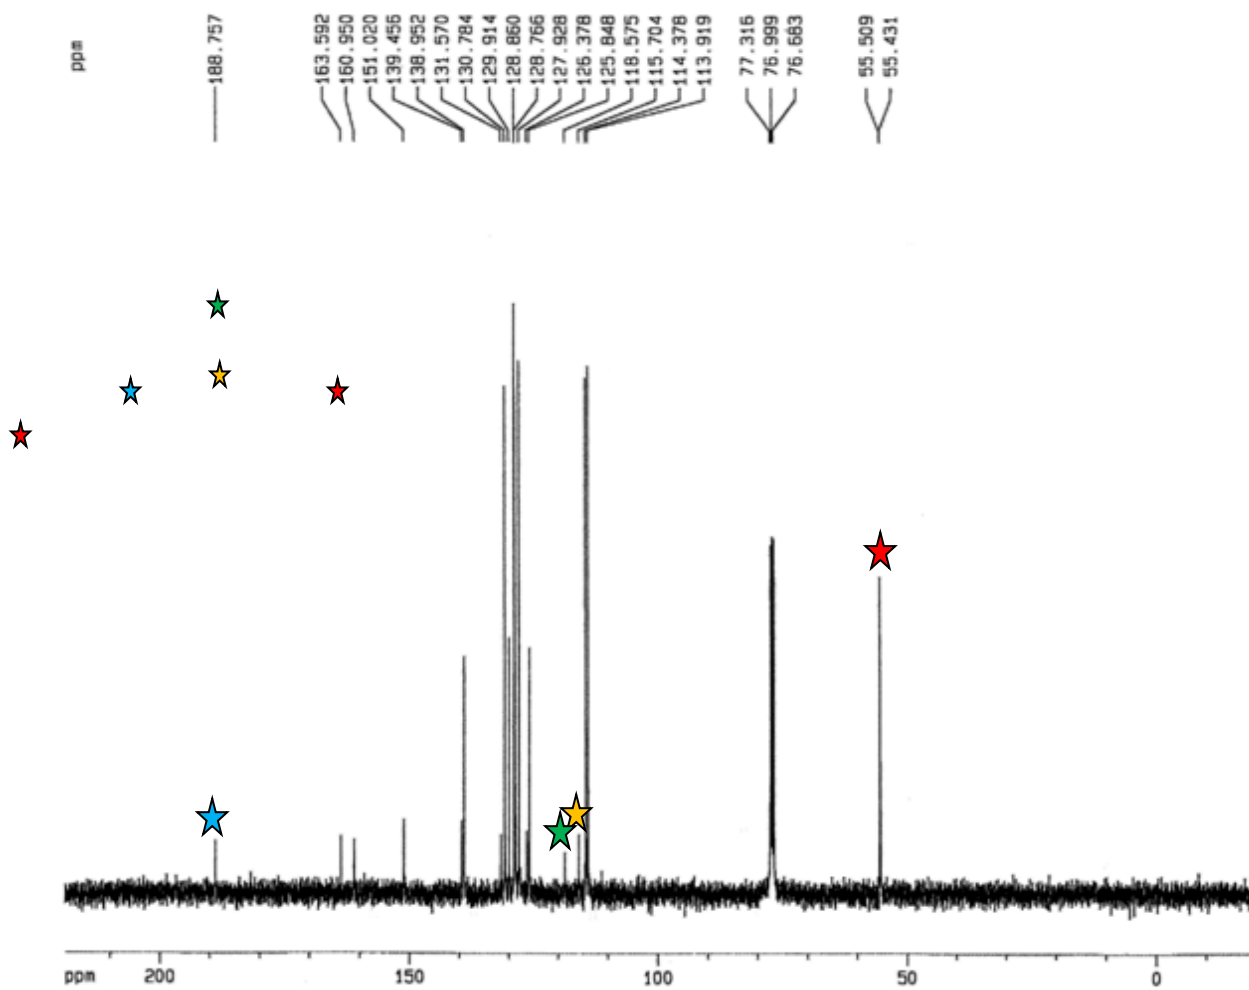

### 3.5. X-ray structure data

CCDC 995679 contains the supplementary crystallographic data for compound **2a**. These data can be obtained free of charge from the Cambridge Crystallographic Data Centre via [www.ccdc.cam.ac.uk/data\\_request/cif](http://www.ccdc.cam.ac.uk/data_request/cif).

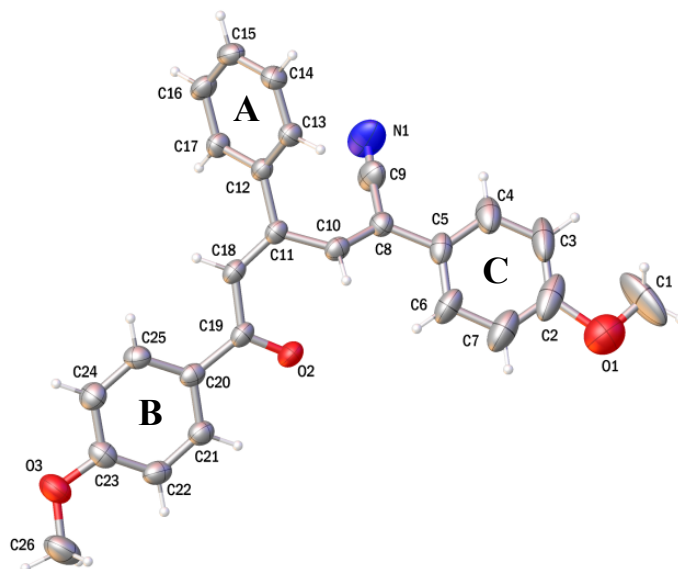

Three phenyl rings are not coplanar and the central ring A is twisted by a large dihedral angle ( $56.18^\circ$ ), relative to the lateral ring B, and the dihedral angle between benzene rings A and C is even larger ( $60.24^\circ$ ) due to the higher steric congestion between them. The carbonyl oxygen O(2) is involved in a non-classical intramolecular interaction, C(10)-H...O(2), with a H...O distance of 2.365 Å and an C(10)-H...O(2) angle of  $101.83^\circ$ . Adjacent molecules are linked together via non-classic C(15)H...O(2) intermolecular hydrogen bonds with H...O distance of 2.66 Å. Repetition of these hydrogen bonds leads to the formation of a 1D chain structure which extends to a single 3D-network structure by the intermolecular C-H... $\pi$  interactions.

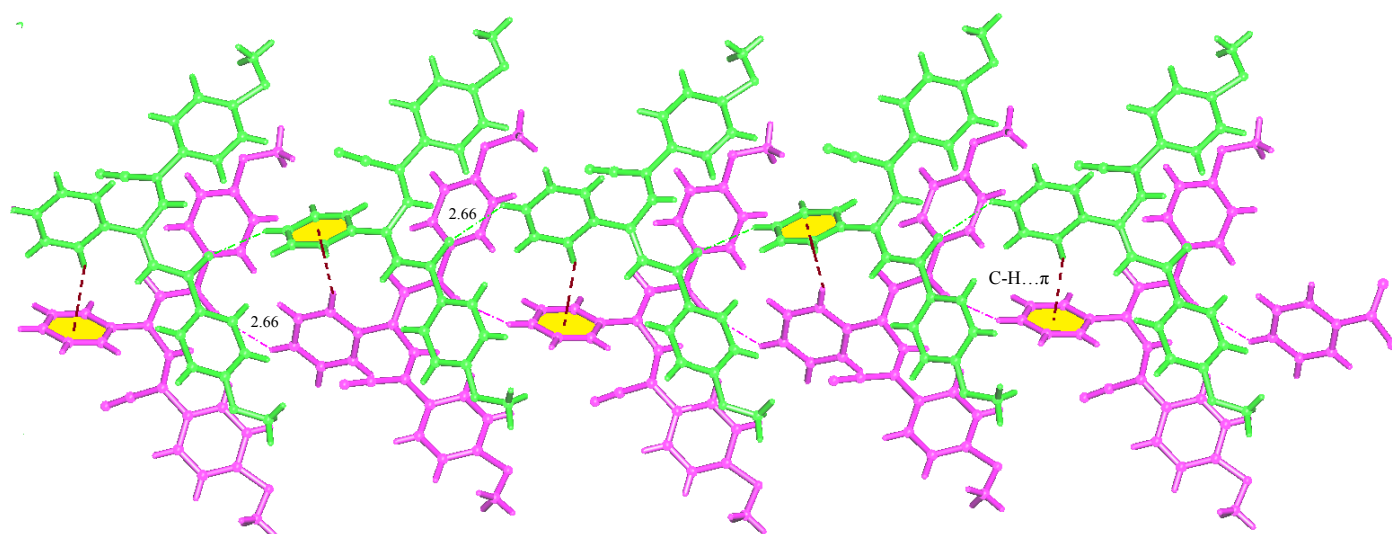

**Table 1**Crystal data and structure refinement for **2a**

---

|                                                     |                                                                 |
|-----------------------------------------------------|-----------------------------------------------------------------|
| Chemical formula                                    | C <sub>26</sub> H <sub>21</sub> N O <sub>3</sub>                |
| Formula weight                                      | 395.44                                                          |
| Temperature (K)                                     | 298(2)                                                          |
| Crystal system                                      | Orthorhombic                                                    |
| Space group                                         | <i>Pbca</i>                                                     |
| <i>a</i> (Å)                                        | 7.4208(15)                                                      |
| <i>b</i> (Å)                                        | 19.207(4)                                                       |
| <i>c</i> (Å)                                        | 29.746(6)                                                       |
| <i>V</i> (Å <sup>3</sup> )                          | 4239.7(15)                                                      |
| <i>Z</i>                                            | 8                                                               |
| Absorption coefficient (mm <sup>-1</sup> )          | 0.081                                                           |
| D <sub>x</sub> (Mg/m <sup>3</sup> )                 | 1.239                                                           |
| Crystal size (mm)                                   | 0.26 × 0.18 × 0.10                                              |
| <i>F</i> (000)                                      | 1664                                                            |
| $\theta$ Ranges (°)                                 | 2.52–25.00                                                      |
| Reflections collected                               | 15918                                                           |
| Independent reflections ( <i>R</i> <sub>int</sub> ) | 3729 ( <i>R</i> <sub>(int)</sub> = 0.0659)                      |
| Data/restraints/parameters                          | 3729/0/259                                                      |
| Goodness-of-fit on <i>F</i> <sup>2</sup>            | 0.724                                                           |
| Final <i>R</i> indices                              | <i>R</i> <sub>1</sub> = 0.0550, <i>wR</i> <sub>2</sub> = 0.1200 |
| <i>R</i> indices (all data)                         | <i>R</i> <sub>1</sub> = 0.1727, <i>wR</i> <sub>2</sub> = 0.1450 |
| Range of <i>h, k, l</i>                             | –8 / 8, –22 / 22, –35 / 33                                      |

---

**Table 2**Selected bond lengths and angles for **2a**

| <i>Bond lengths (Å)</i> |          | <i>Bond lengths (Å)</i> |          |
|-------------------------|----------|-------------------------|----------|
| C(2)-C(3)               | 1.3900   | C(12)-C(17)             | 1.396(4) |
| C(2)-C(7)               | 1.3900   | C(13)-C(14)             | 1.380(4) |
| C(2)-O(1)               | 1.516(5) | C(14)-C(15)             | 1.371(5) |
| C(3)-C(4)               | 1.3900   | C(15)-C(16)             | 1.371(5) |
| C(4)-C(5)               | 1.3900   | C(16)-C(17)             | 1.382(5) |
| C(5)-C(6)               | 1.3900   | C(18)-C(19)             | 1.476(4) |
| C(5)-C(8)               | 1.489(4) | C(19)-O(2)              | 1.230(4) |
| C(6)-C(7)               | 1.3900   | C(19)-C(20)             | 1.492(5) |
| C(1)-O(1)               | 1.261(5) | C(20)-C(21)             | 1.380(4) |
| C(8)-C(10)              | 1.334(5) | C(20)-C(25)             | 1.387(5) |
| C(8)-C(9)               | 1.438(6) | C(21)-C(22)             | 1.376(5) |
| C(9)-N(1)               | 1.128(5) | C(22)-C(23)             | 1.367(5) |
| C(10)-C(11)             | 1.459(4) | C(23)-O(3)              | 1.366(4) |
| C(11)-C(18)             | 1.338(5) | C(23)-C(24)             | 1.390(5) |
| C(11)-C(12)             | 1.492(4) | C(24)-C(25)             | 1.370(5) |
| C(12)-C(13)             | 1.387(5) | C(26)-O(3)              | 1.426(5) |
| <i>Bond angles (°)</i>  |          | <i>Bond angles (°)</i>  |          |
| C(3)-C(2)-C(7)          | 120.0    | C(14)-C(13)-C(12)       | 120.4(3) |
| C(3)-C(2)-O(1)          | 131.1(4) | C(15)-C(14)-C(13)       | 120.8(4) |
| C(7)-C(2)-O(1)          | 108.9(4) | C(16)-C(15)-C(14)       | 119.4(4) |
| C(4)-C(3)-C(2)          | 120.0    | C(15)-C(16)-C(17)       | 120.6(4) |
| C(3)-C(4)-C(5)          | 120.0    | C(16)-C(17)-C(12)       | 120.2(4) |
| C(6)-C(5)-C(4)          | 120.0    | C(11)-C(18)-C(19)       | 125.9(3) |
| C(6)-C(5)-C(8)          | 118.7(3) | O(2)-C(19)-C(18)        | 119.9(4) |
| C(4)-C(5)-C(8)          | 121.2(3) | O(2)-C(19)-C(20)        | 119.3(3) |
| C(5)-C(6)-C(7)          | 120.0    | C(18)-C(19)-C(20)       | 120.8(3) |
| C(6)-C(7)-C(2)          | 120.0    | C(21)-C(20)-C(25)       | 117.8(4) |
| C(10)-C(8)-C(9)         | 120.2(3) | C(21)-C(20)-C(19)       | 118.7(3) |
| C(10)-C(8)-C(5)         | 123.0(3) | C(25)-C(20)-C(19)       | 123.5(3) |
| C(9)-C(8)-C(5)          | 116.4(4) | C(22)-C(21)-C(20)       | 121.8(4) |

|                   |          |                   |          |
|-------------------|----------|-------------------|----------|
| N(1)-C(9)-C(8)    | 176.7(5) | C(23)-C(22)-C(21) | 119.6(4) |
| C(8)-C(10)-C(11)  | 128.3(3) | O(3)-C(23)-C(22)  | 126.1(4) |
| C(18)-C(11)-C(10) | 121.7(3) | O(3)-C(23)-C(24)  | 114.2(4) |
| C(18)-C(11)-C(12) | 120.2(3) | C(22)-C(23)-C(24) | 119.7(4) |
| C(10)-C(11)-C(12) | 118.1(3) | C(25)-C(24)-C(23) | 120.1(4) |
| C(13)-C(12)-C(17) | 118.4(3) | C(24)-C(25)-C(20) | 120.9(4) |
| C(13)-C(12)-C(11) | 120.6(3) | C(1)-O(1)-C(2)    | 102.4(5) |
| C(17)-C(12)-C(11) | 120.9(3) | C(23)-O(3)-C(26)  | 118.9(4) |

---

Symmetry operator i): -x, -y, -z



#### 4. Comparison of the $^1\text{H}$ NMR spectra of **1a** and **2a**

The  $^1\text{H}$  NMR spectra of receptor **1a** were characterized by the presence of the aromatic resonances in the 7.22-8.36 range. The most characteristic signal in this zone is a singlet at *ca.* 8.36 ppm, attributed to equivalent protons of the pyrylium ring ( $\text{H}^1$ ,  $\text{H}^2$ ). Also the presence of a singlet centred at *ca.* 3.99 ppm is indicative of the presence of equivalent protons of the methoxy groups. The  $^1\text{H}$  NMR spectra of product **2a** show two distinct singlets for the nonequivalent protons of methoxy and two singlets at *ca.* 7.24 and 8.35 ppm ( $j = 1.6$  Hz) for  $\text{H}^1$  and  $\text{H}^2$ , respectively.

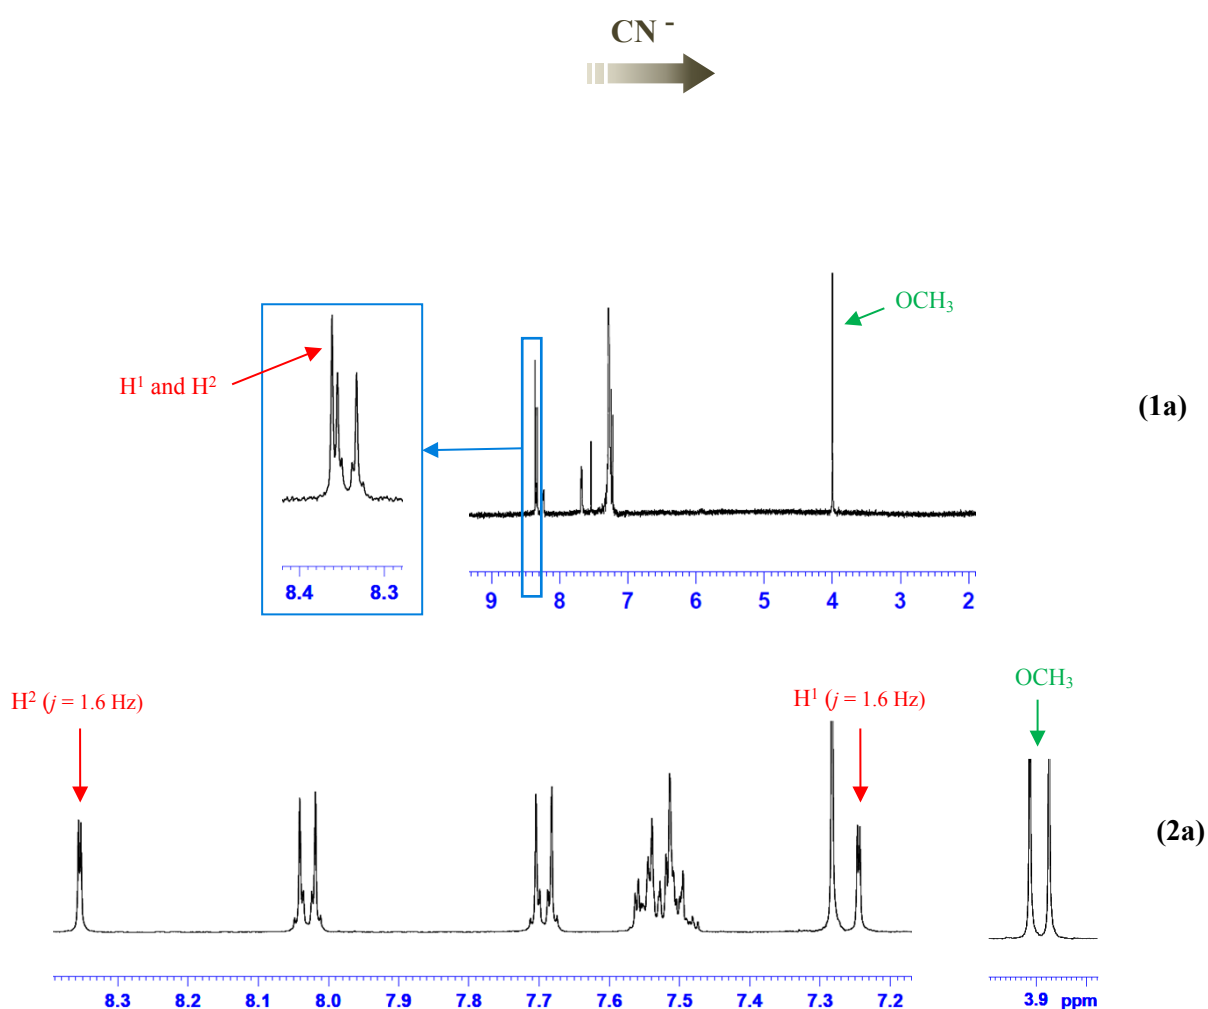

## 5. Absorption spectra

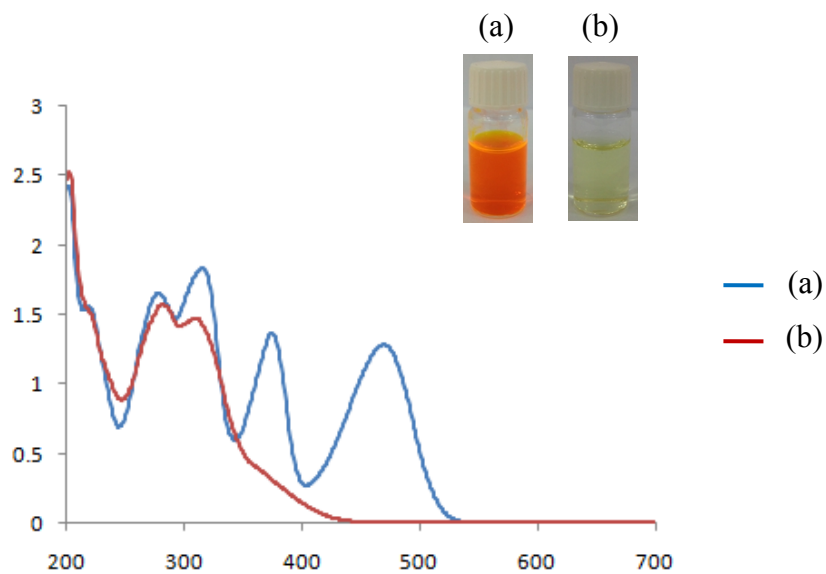

Figure S1. Steady-state absorption spectra (1 mM, MeCN) of (a) **1a** and (b) **2a**

## 6. Fluorescence emission spectra

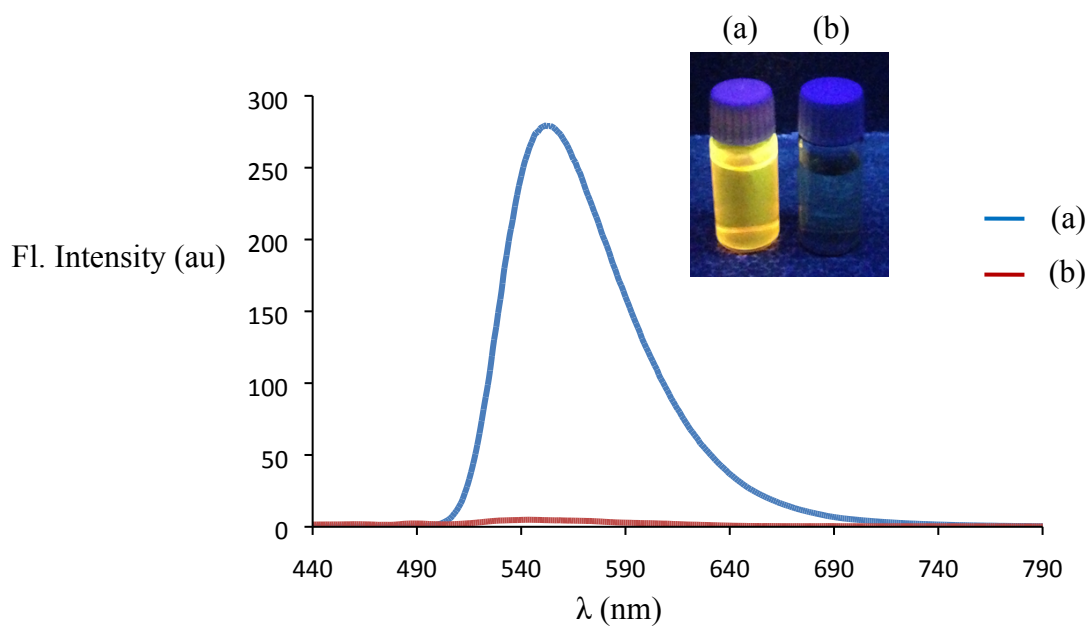

Figure S2. Fluorescence emission spectra (10  $\mu$ M, MeCN) of (a) **1a** and (b) **2a**

## 7. Determination of detection limit of $\text{CN}^-$

The detection limit was calculated by UV-Vis spectroscopy. To determine the standard deviation of blank measurements, the absorption intensity of **1a**/ $\gamma$ - $\text{Al}_2\text{O}_3$  without  $\text{CN}^-$  was measured by 8 times. Under the present conditions, a good linear relationship between the absorption intensity and  $\text{CN}^-$  concentration could be obtained in the 0.5 – 4 ppm ( $R = 0.9964$ ). The detection limit is then calculated with the equation: detection limit =  $3\sigma_{bi}/m$ , where  $\sigma_{bi}$  is the standard deviation of blank measurements;  $m$  is the slope between intensity versus sample concentration. The detection limit was measured to be 0.23 ppm.

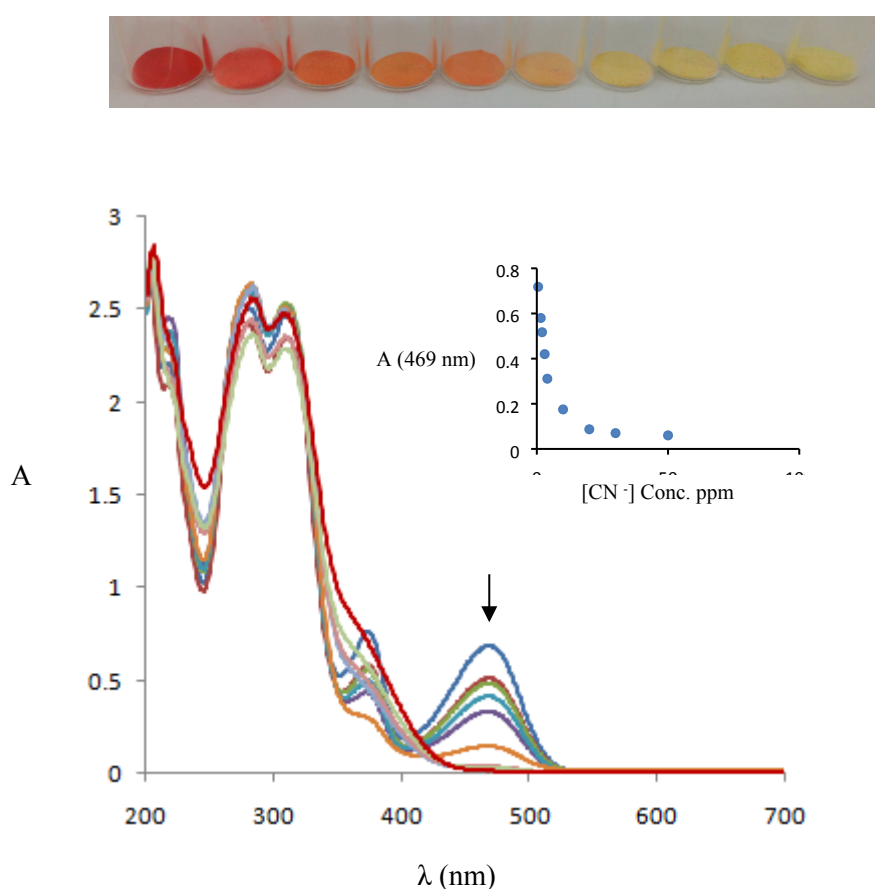

**Figure S3.** Selected UV/Vis titration curve of heterogeneous **1a**/ $\gamma$ -alumina with cyanide in water (inset: cyanide concentration abs. at 469 nm).

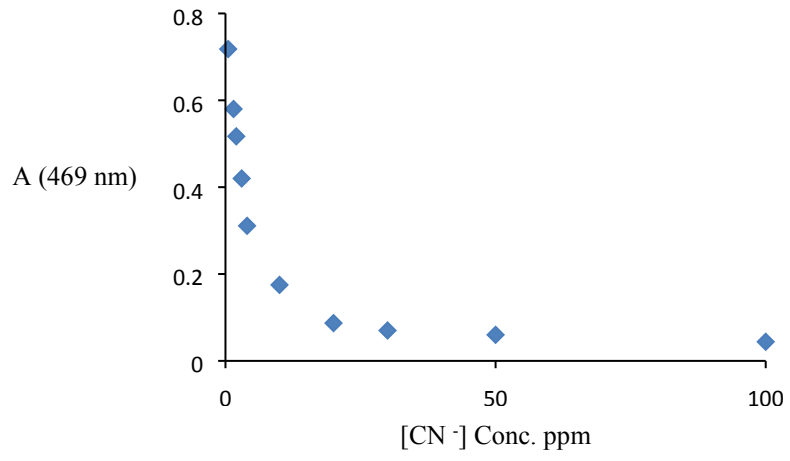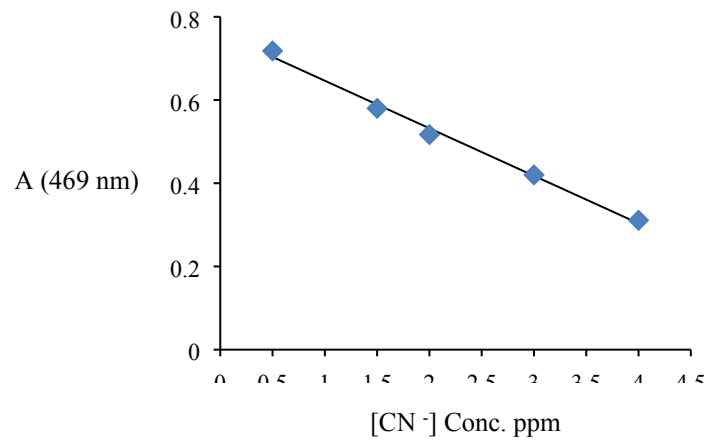

## 8. Selectivity towards other common anions

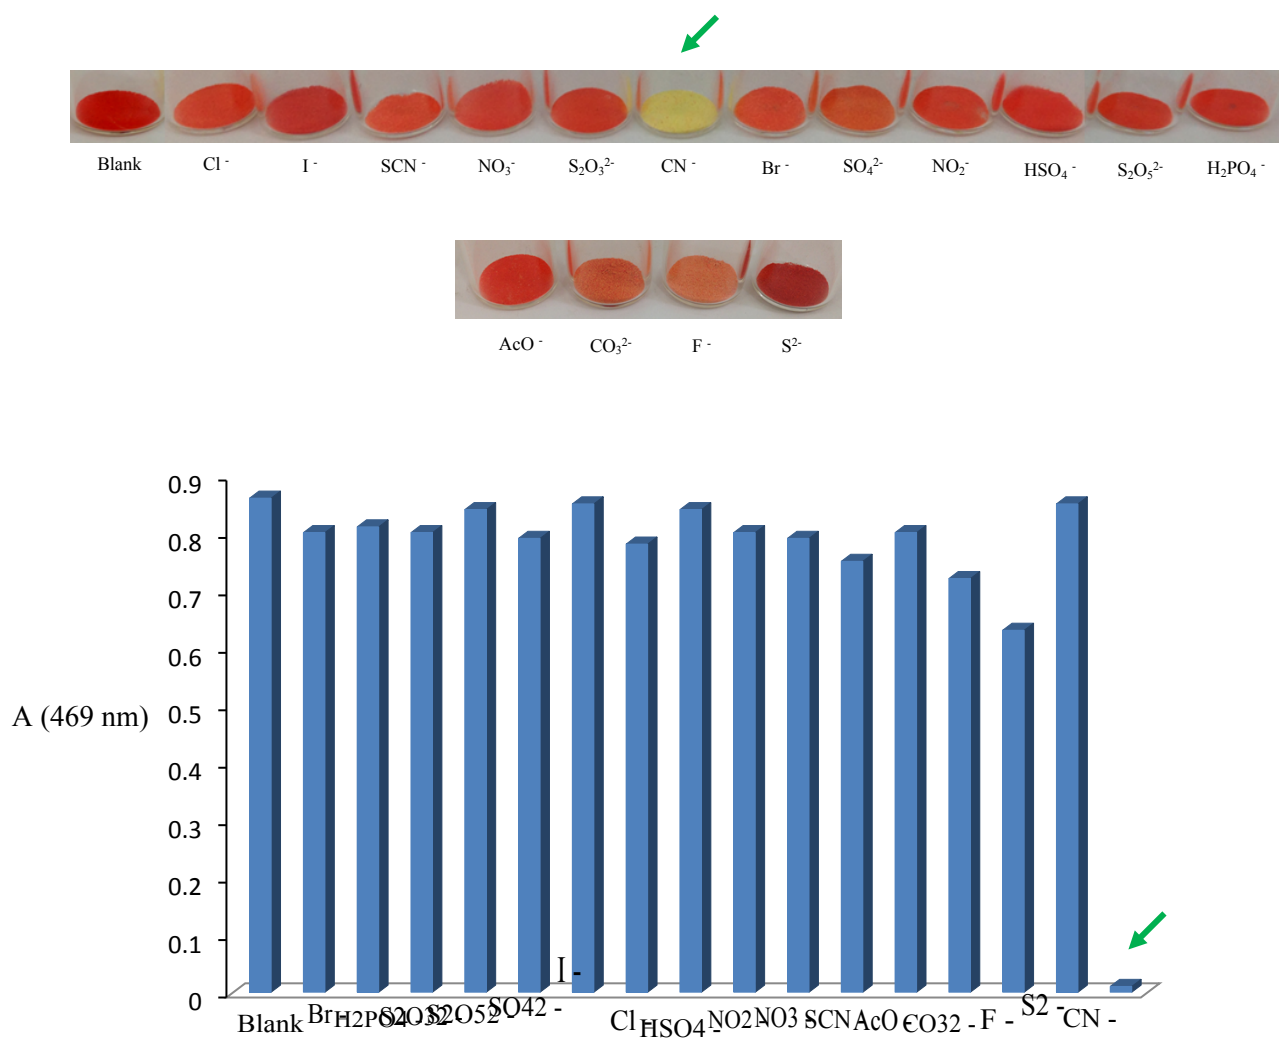

**Figure S4.** The absorption of chromoreactand **1a**/ $\gamma$ -Al<sub>2</sub>O<sub>3</sub> (at 469 nm in water) in the presence of 1 equiv. of cyanide and 10 equiv. of other anions
